# Supplementary material for: Incidence, Risk Factors, and Nomogram of Transfusion and Associated Complications in Nonfracture Patients following Total Hip Arthroplasty
Source: PubMed Central journal article supplement (PMC7584933; doi:10.1155/2020/2928945), 2020-10-14

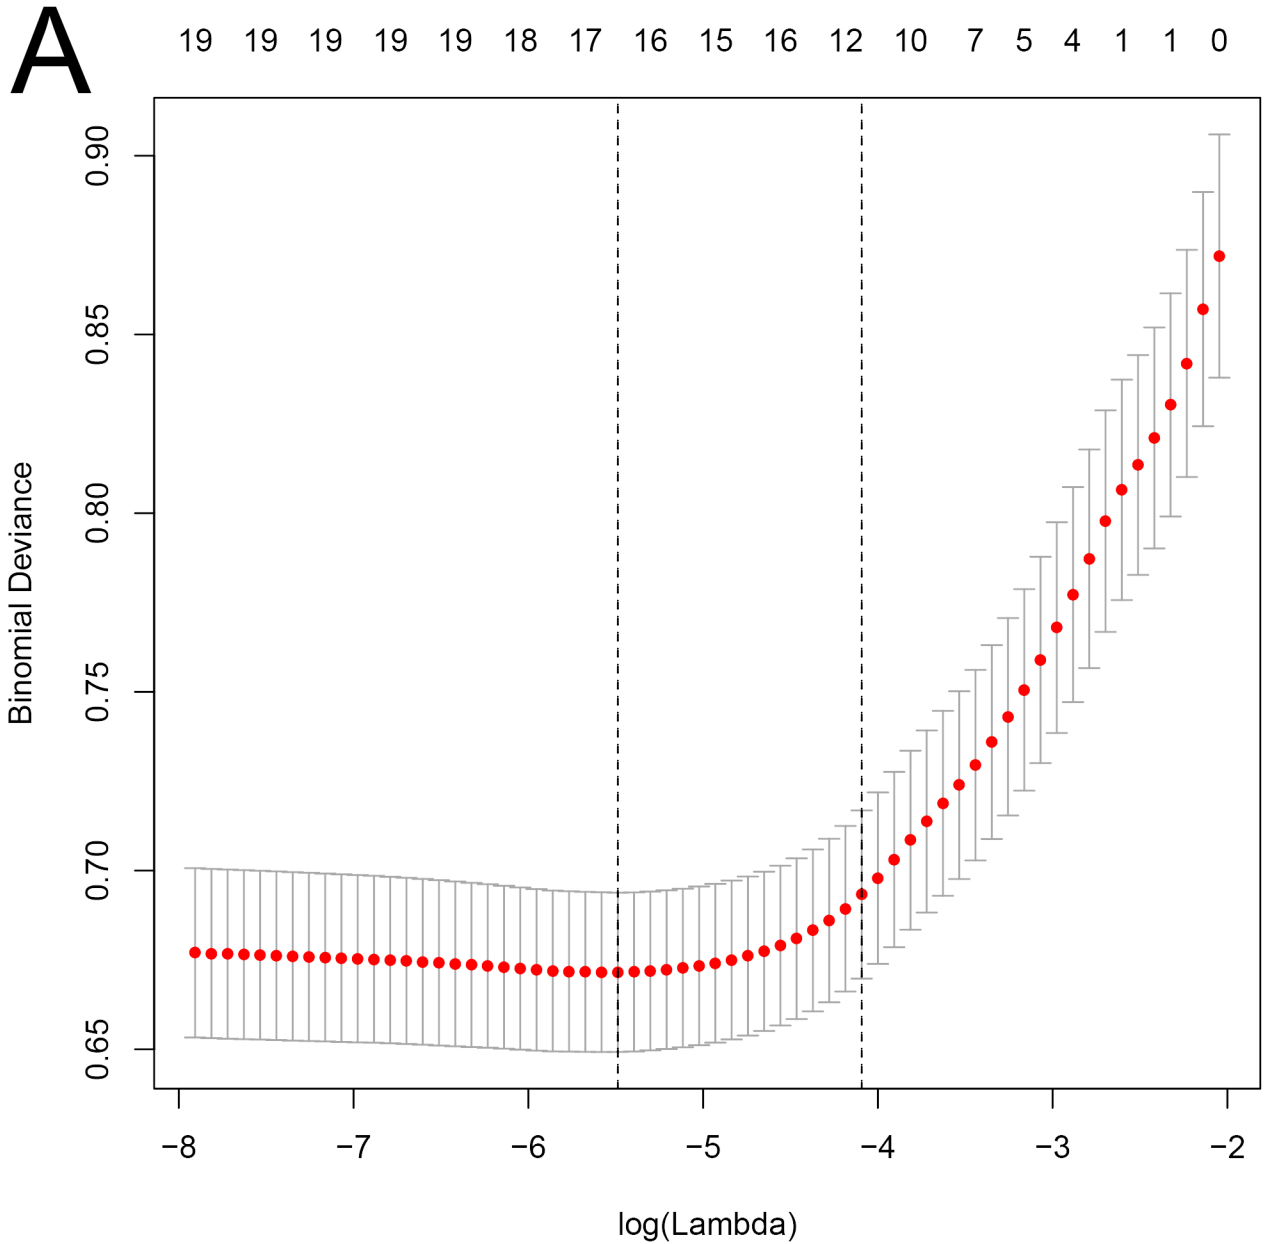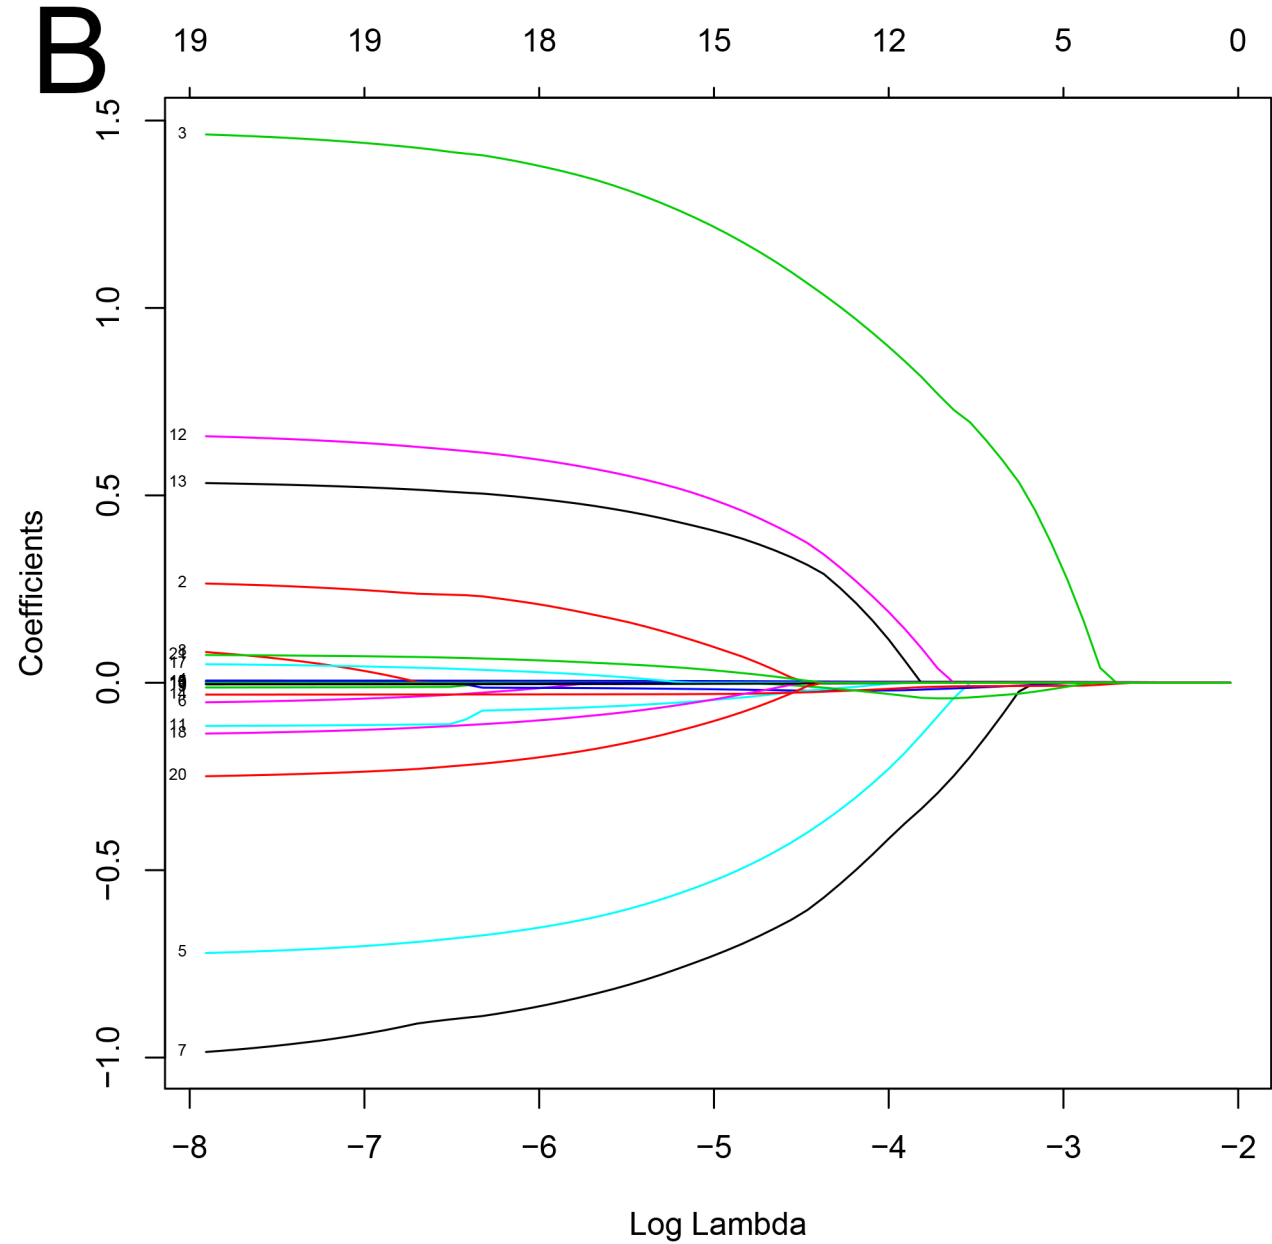

Supplement: 2928945.f1.pdf [file 2928945.f1.pdf]
